# Supplementary material for: Notopterol Ameliorates Hyperuricemia-Induced Cardiac Dysfunction in Mice
Source: Pharmaceuticals (Basel). 2023 Feb 27;16(3):361. doi: 10.3390/ph16030361 (PMC10052463; doi:10.3390/ph16030361)
Supplement: Supplementary file 1 [file pharmaceuticals-16-00361-s001.zip › Supplementary Material.pdf]

**Data of Figure 2A (n=5)**

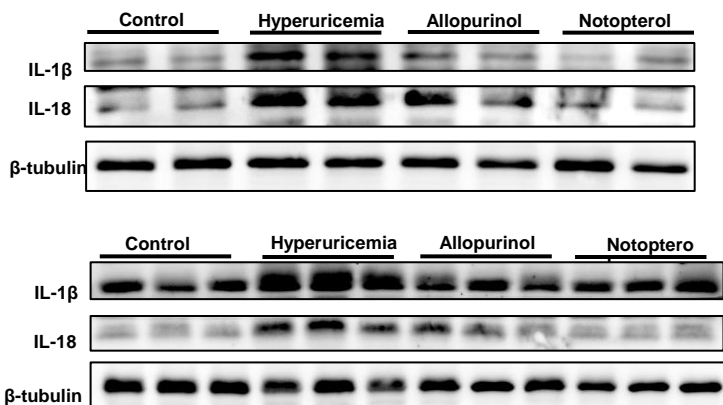

**Data of Figure 3A (n=5)**

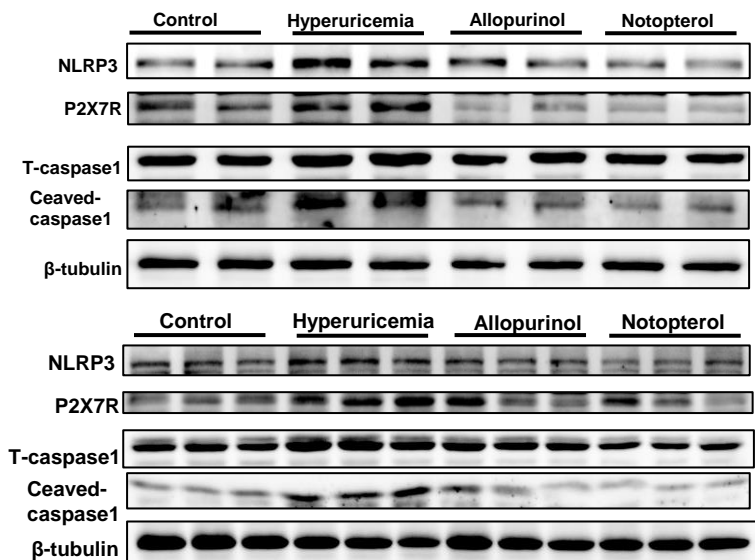

**Data of Figure 4A (n=3)**

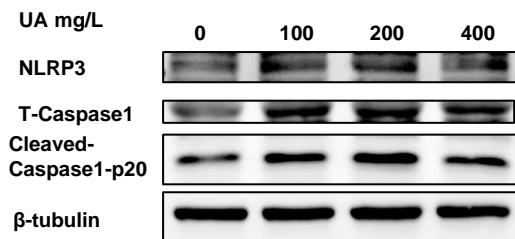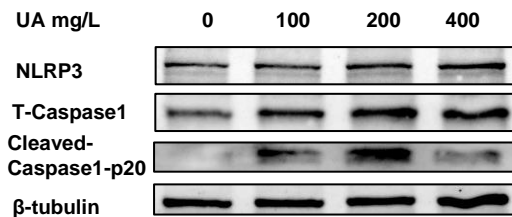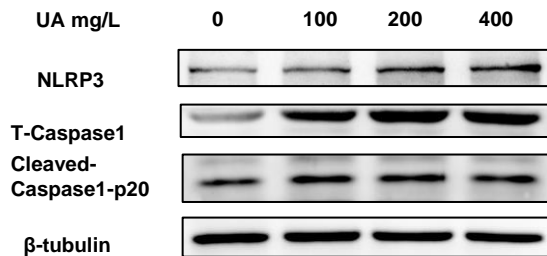

**Data of Figure 4G (n=3)**

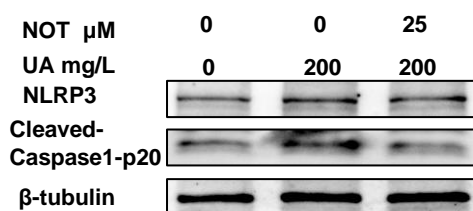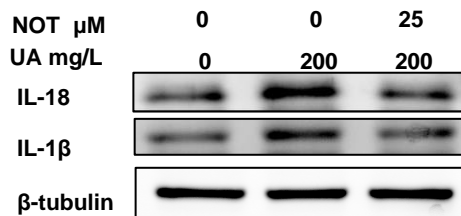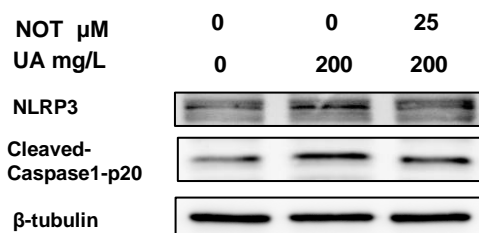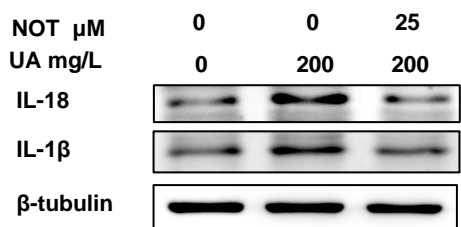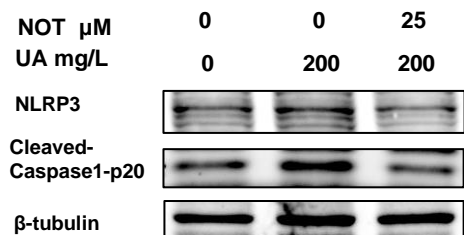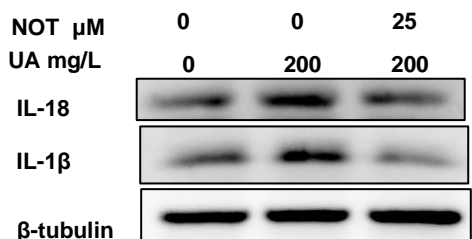

### Data of Figure 5A (n=3)

| UA (mg/L) | 0 | 100 | 200 | 400 |
|-----------|---|-----|-----|-----|
|-----------|---|-----|-----|-----|

|       |                                                                                   |                                                                                   |                                                                                   |                                                                                   |
|-------|-----------------------------------------------------------------------------------|-----------------------------------------------------------------------------------|-----------------------------------------------------------------------------------|-----------------------------------------------------------------------------------|
| P2X7R | 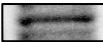 | 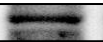 | 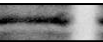 | 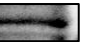 |
|-------|-----------------------------------------------------------------------------------|-----------------------------------------------------------------------------------|-----------------------------------------------------------------------------------|-----------------------------------------------------------------------------------|

|                  |                                                                                   |                                                                                   |                                                                                   |                                                                                   |
|------------------|-----------------------------------------------------------------------------------|-----------------------------------------------------------------------------------|-----------------------------------------------------------------------------------|-----------------------------------------------------------------------------------|
| $\beta$ -tubulin | 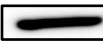 | 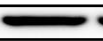 | 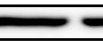 | 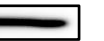 |
|------------------|-----------------------------------------------------------------------------------|-----------------------------------------------------------------------------------|-----------------------------------------------------------------------------------|-----------------------------------------------------------------------------------|

| UA (mg/L) | 0 | 100 | 200 | 400 |
|-----------|---|-----|-----|-----|
|-----------|---|-----|-----|-----|

|       |                                                                                   |                                                                                   |                                                                                   |                                                                                   |
|-------|-----------------------------------------------------------------------------------|-----------------------------------------------------------------------------------|-----------------------------------------------------------------------------------|-----------------------------------------------------------------------------------|
| P2X7R | 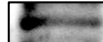 | 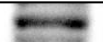 | 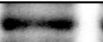 | 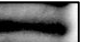 |
|-------|-----------------------------------------------------------------------------------|-----------------------------------------------------------------------------------|-----------------------------------------------------------------------------------|-----------------------------------------------------------------------------------|

|                  |                                                                                   |                                                                                   |                                                                                   |                                                                                   |
|------------------|-----------------------------------------------------------------------------------|-----------------------------------------------------------------------------------|-----------------------------------------------------------------------------------|-----------------------------------------------------------------------------------|
| $\beta$ -tubulin | 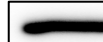 | 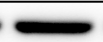 | 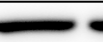 | 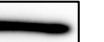 |
|------------------|-----------------------------------------------------------------------------------|-----------------------------------------------------------------------------------|-----------------------------------------------------------------------------------|-----------------------------------------------------------------------------------|

| UA (mg/L) | 0 | 100 | 200 | 400 |
|-----------|---|-----|-----|-----|
|-----------|---|-----|-----|-----|

|       |                                                                                   |                                                                                   |                                                                                   |                                                                                   |
|-------|-----------------------------------------------------------------------------------|-----------------------------------------------------------------------------------|-----------------------------------------------------------------------------------|-----------------------------------------------------------------------------------|
| P2X7R | 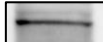 | 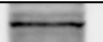 | 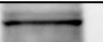 | 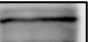 |
|-------|-----------------------------------------------------------------------------------|-----------------------------------------------------------------------------------|-----------------------------------------------------------------------------------|-----------------------------------------------------------------------------------|

|                  |                                                                                   |                                                                                   |                                                                                   |                                                                                   |
|------------------|-----------------------------------------------------------------------------------|-----------------------------------------------------------------------------------|-----------------------------------------------------------------------------------|-----------------------------------------------------------------------------------|
| $\beta$ -tubulin | 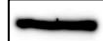 | 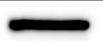 | 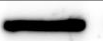 | 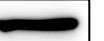 |
|------------------|-----------------------------------------------------------------------------------|-----------------------------------------------------------------------------------|-----------------------------------------------------------------------------------|-----------------------------------------------------------------------------------|

### Data of Figure 5C (n=3)

| NOT $\mu$ M | 0 | 0 | 25 |
|-------------|---|---|----|
|-------------|---|---|----|

|         |   |     |     |
|---------|---|-----|-----|
| UA mg/L | 0 | 200 | 200 |
|---------|---|-----|-----|

|       |                                                                                   |                                                                                   |                                                                                   |
|-------|-----------------------------------------------------------------------------------|-----------------------------------------------------------------------------------|-----------------------------------------------------------------------------------|
| P2X7R | 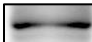 | 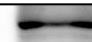 | 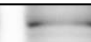 |
|-------|-----------------------------------------------------------------------------------|-----------------------------------------------------------------------------------|-----------------------------------------------------------------------------------|

|                  |                                                                                   |                                                                                   |                                                                                   |
|------------------|-----------------------------------------------------------------------------------|-----------------------------------------------------------------------------------|-----------------------------------------------------------------------------------|
| $\beta$ -tubulin | 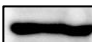 | 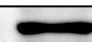 | 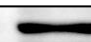 |
|------------------|-----------------------------------------------------------------------------------|-----------------------------------------------------------------------------------|-----------------------------------------------------------------------------------|

| NOT $\mu$ M | 0 | 0 | 25 |
|-------------|---|---|----|
|-------------|---|---|----|

|         |   |     |     |
|---------|---|-----|-----|
| UA mg/L | 0 | 200 | 200 |
|---------|---|-----|-----|

|       |                                                                                   |                                                                                   |                                                                                    |
|-------|-----------------------------------------------------------------------------------|-----------------------------------------------------------------------------------|------------------------------------------------------------------------------------|
| P2X7R | 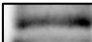 | 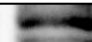 | 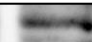 |
|-------|-----------------------------------------------------------------------------------|-----------------------------------------------------------------------------------|------------------------------------------------------------------------------------|

|                  |                                                                                   |                                                                                   |                                                                                    |
|------------------|-----------------------------------------------------------------------------------|-----------------------------------------------------------------------------------|------------------------------------------------------------------------------------|
| $\beta$ -tubulin | 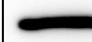 | 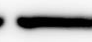 | 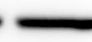 |
|------------------|-----------------------------------------------------------------------------------|-----------------------------------------------------------------------------------|------------------------------------------------------------------------------------|

| NOT $\mu$ M | 0 | 0 | 25 |
|-------------|---|---|----|
|-------------|---|---|----|

|         |   |     |     |
|---------|---|-----|-----|
| UA mg/L | 0 | 200 | 200 |
|---------|---|-----|-----|

|       |                                                                                     |                                                                                     |                                                                                     |
|-------|-------------------------------------------------------------------------------------|-------------------------------------------------------------------------------------|-------------------------------------------------------------------------------------|
| P2X7R | 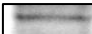 | 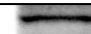 | 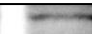 |
|-------|-------------------------------------------------------------------------------------|-------------------------------------------------------------------------------------|-------------------------------------------------------------------------------------|

|                  |                                                                                     |                                                                                     |                                                                                     |
|------------------|-------------------------------------------------------------------------------------|-------------------------------------------------------------------------------------|-------------------------------------------------------------------------------------|
| $\beta$ -tubulin | 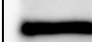 | 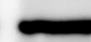 | 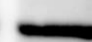 |
|------------------|-------------------------------------------------------------------------------------|-------------------------------------------------------------------------------------|-------------------------------------------------------------------------------------|

Data of Figure 6A (n=3)

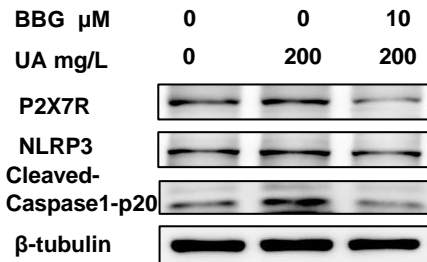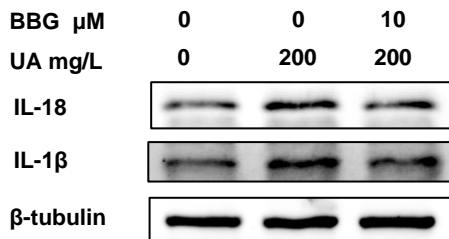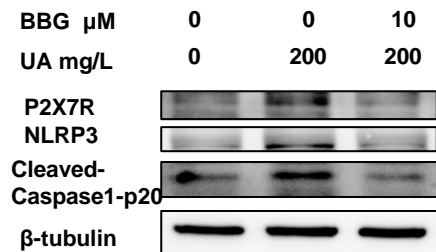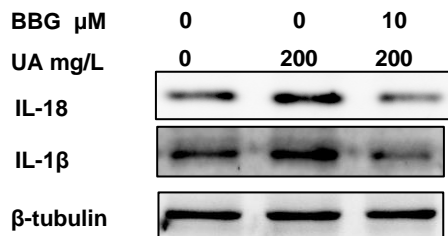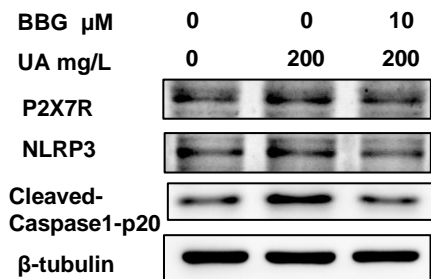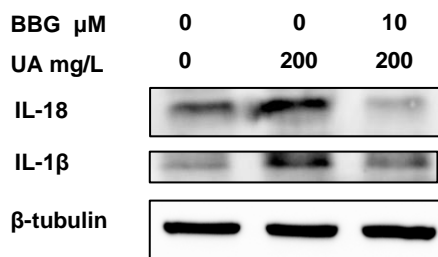

# Data of Figure 6D (n=3)

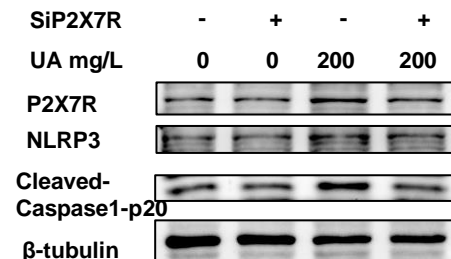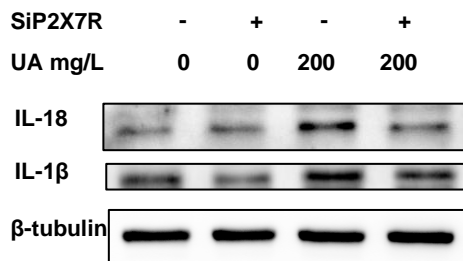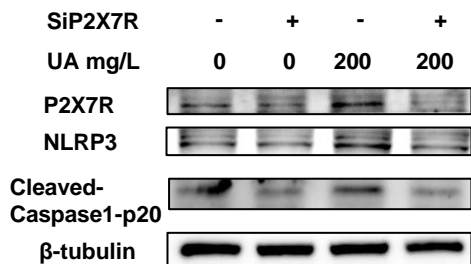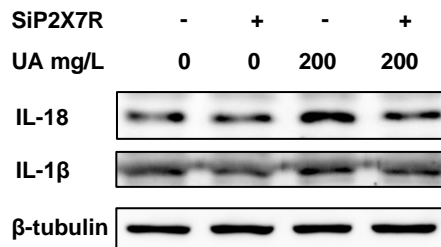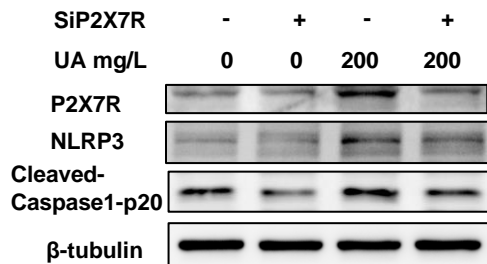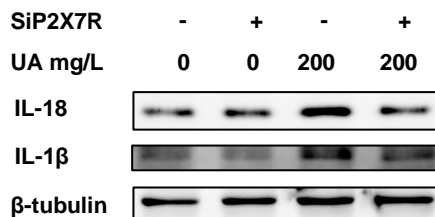

# Data of Figure 7A (n=3)

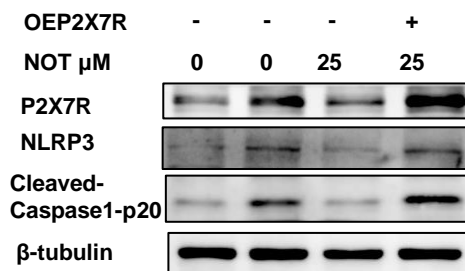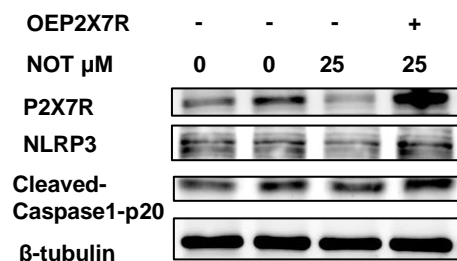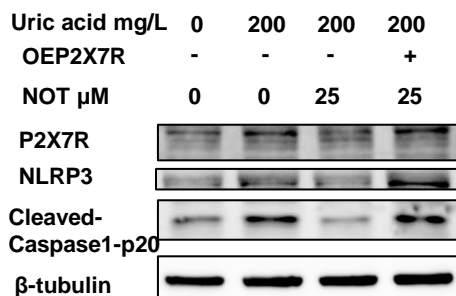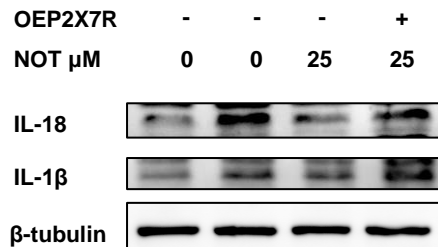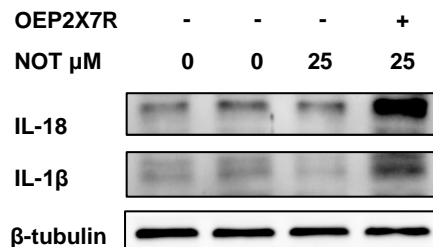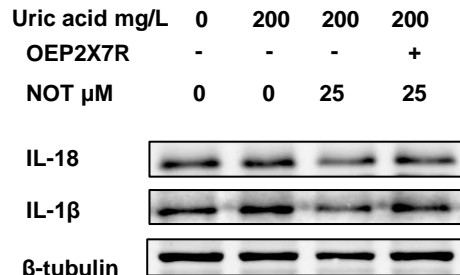

## Internal positive controls of antibodies

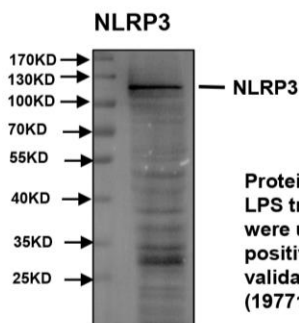

Proteins extracted from LPS treated THP-1 cells were used as internal positive controls to validate NLRP3 antibody. (19771, Proteintech)

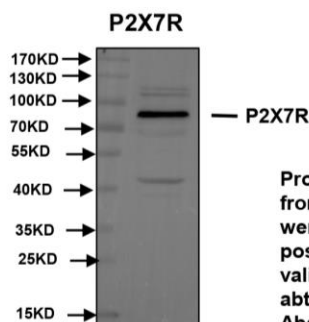

Proteins extracted from lung tissue of rat were used as internal positive controls to validate P2X7R antibody. (A10511, Abclonal)

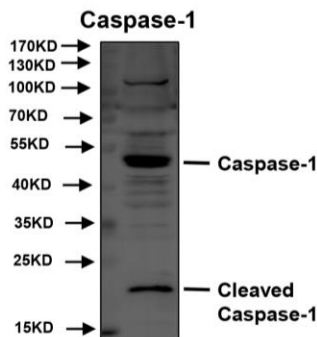

Proteins extracted from LPS treated THP-1 cells were used as internal positive controls to validate Caspase-1 antibody. (A16792, Abclonal)

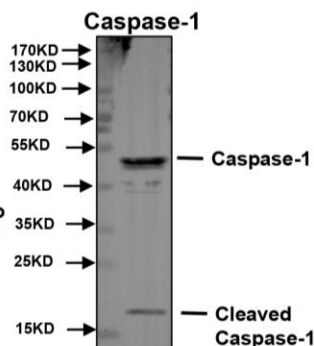

Proteins extracted from LPS treated THP-1 cells were used as internal positive controls to validate Caspase-1 antibody. (22915, Proteintech)

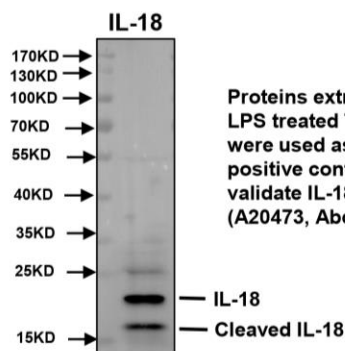

Proteins extracted from LPS treated THP-1 cells were used as internal positive controls to validate IL-18 antibody. (A20473, Abclonal)

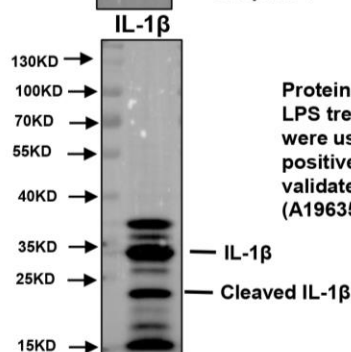

Proteins extracted from LPS treated THP-1 cells were used as internal positive controls to validate IL-1 $\beta$  antibody. (A19635, Abclonal)
